# Supplementary material for: The potential of rice to offer solutions for malnutrition and chronic diseases
Source: PubMed Central journal article supplement (PMC4883736; doi:10.1186/1939-8433-5-16), 2012-07-02

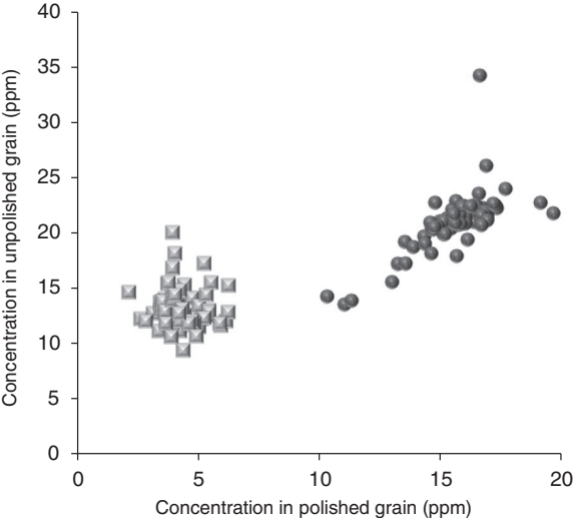

Supplement: 12284_2011_28_MOESM2_ESM.pdf [file 12284_2011_28_MOESM2_ESM.pdf]
